# Supplementary material for: Corrosion inhibition studies of ferrocenyl Schiff bases in a mild acidic medium through experimental methods and DFT calculations
Source: Royal Society of Chemistry journal article supplement (doi:10.1039/d1nj05612c), 2022-01-01
Supplement: d1nj05612c1.pdf [file d1nj05612c1.pdf]

## *Corrosion inhibition studies of ferrocenyl Schiff bases in mild acidic medium through experimental methods and DFT calculations*

Uzma Nazir<sup>a</sup>, Zareen Akhter<sup>a,\*</sup>, Naveed Zafar Ali<sup>b</sup>, Rizwan Hussain<sup>c</sup>, Faroha Liaquat<sup>a</sup>, Alisha Tahir<sup>a</sup>, Samina Qamar<sup>a</sup>

<sup>a</sup>Department of Chemistry, Quaid-i-Azam University, Islamabad-45320, Pakistan

<sup>b</sup>National Center for Physics, Quaid-i-Azam University Campus, Islamabad, Pakistan

<sup>c</sup>Laboratory for Advanced Materials Processing (LAMP), NCP, Islamabad, Pakistan

\*Corresponding author's mail: [zareen\\_a@gau.edu.pk](mailto:zareen_a@gau.edu.pk)

### Supplementary Information

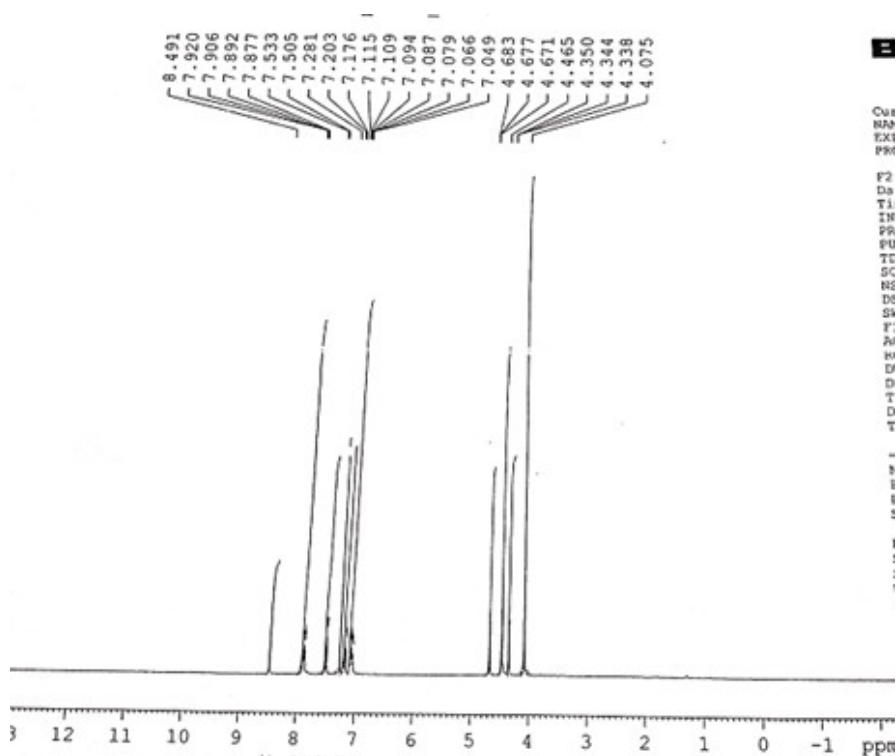

Fig. S1. <sup>1</sup>H NMR spectrum of FcA in CDCl<sub>3</sub>

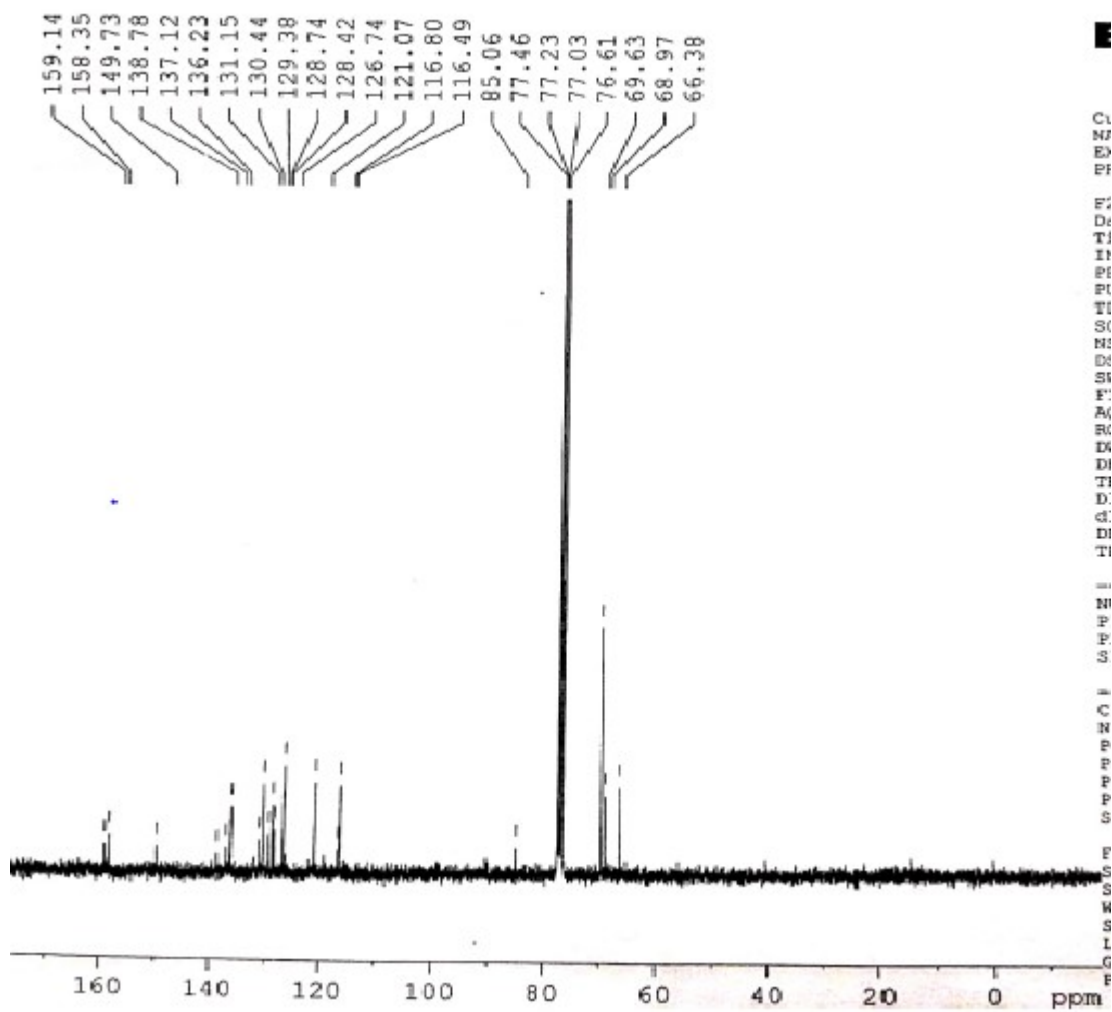

Fig. S2.  $^{13}\text{C}$  NMR spectrum of FcA  $\text{CDCl}_3$

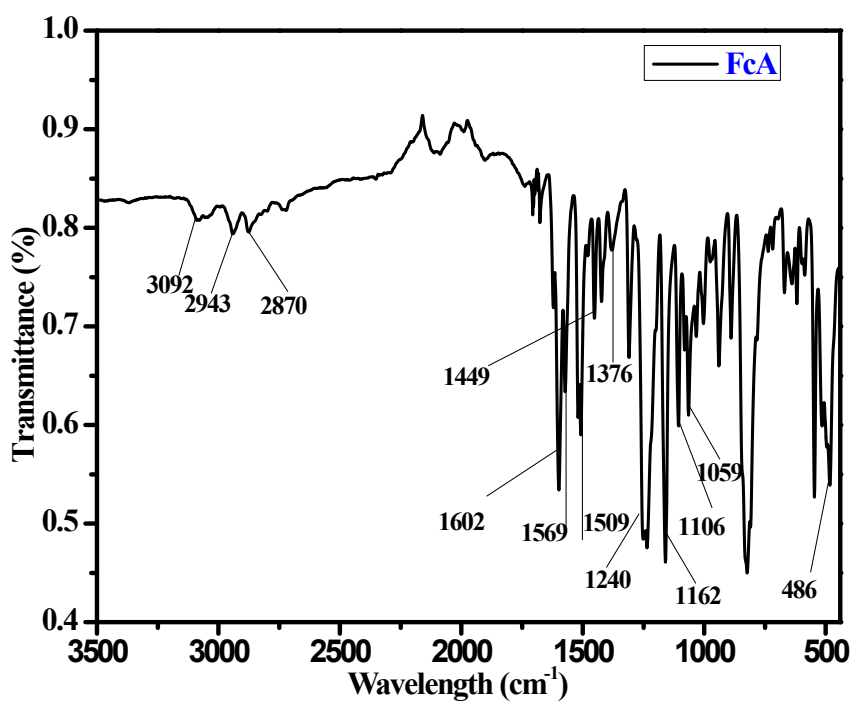

Fig. S3. FT-IR spectrum of FcA

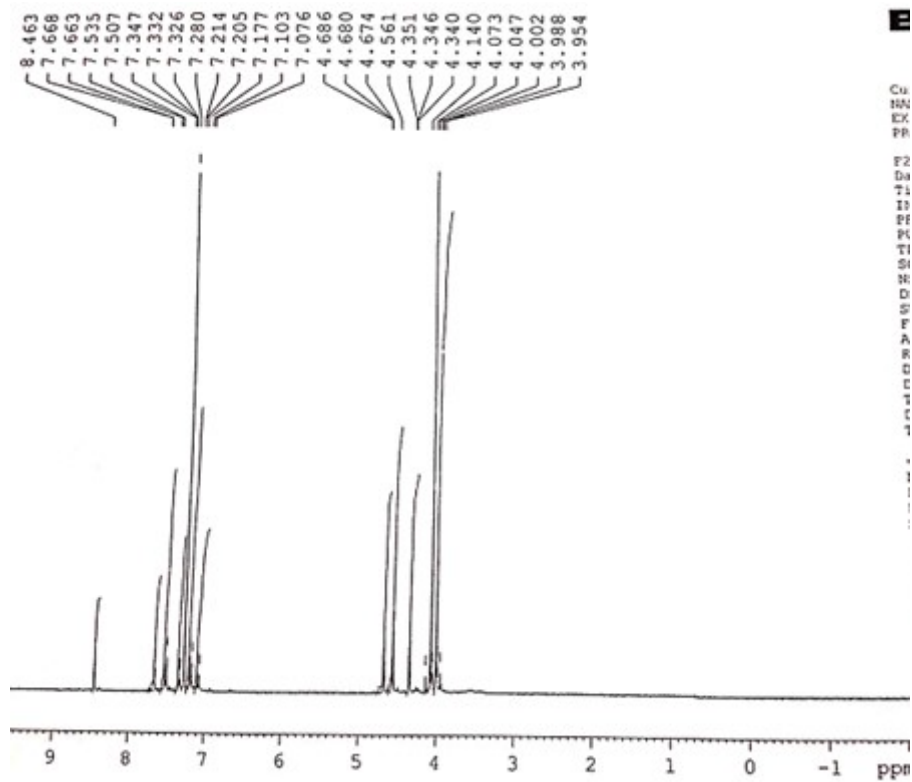

Fig. S4. <sup>1</sup>H NMR spectrum of FcB in CDCl<sub>3</sub>



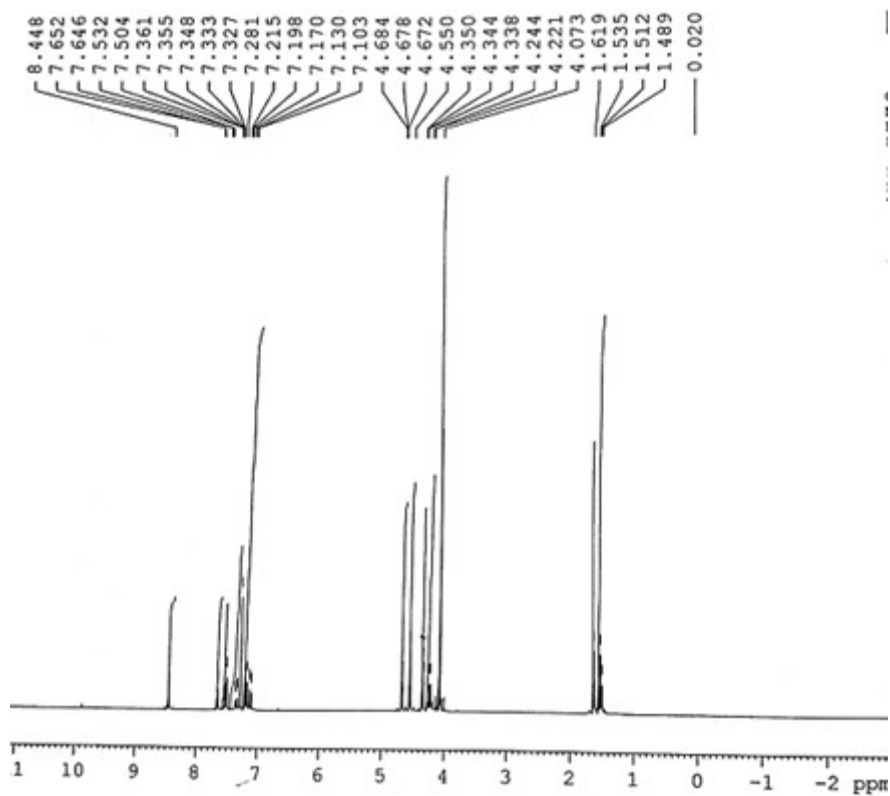

Fig. S7.  $^1\text{H}$  NMR spectrum of FcC in  $\text{CDCl}_3$

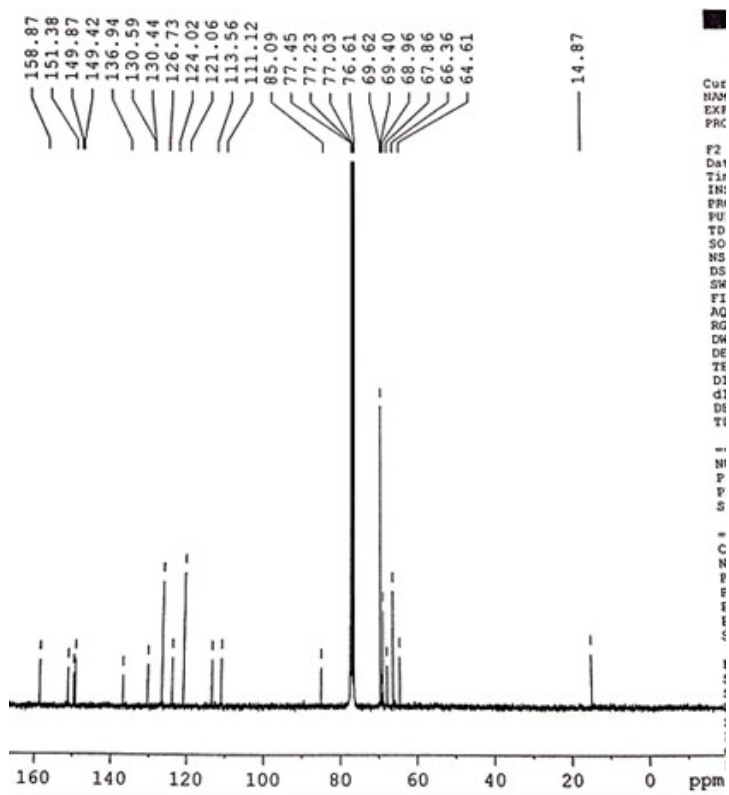

Fig. S8.  $^{13}\text{C}$  NMR spectrum of FcC in  $\text{CDCl}_3$

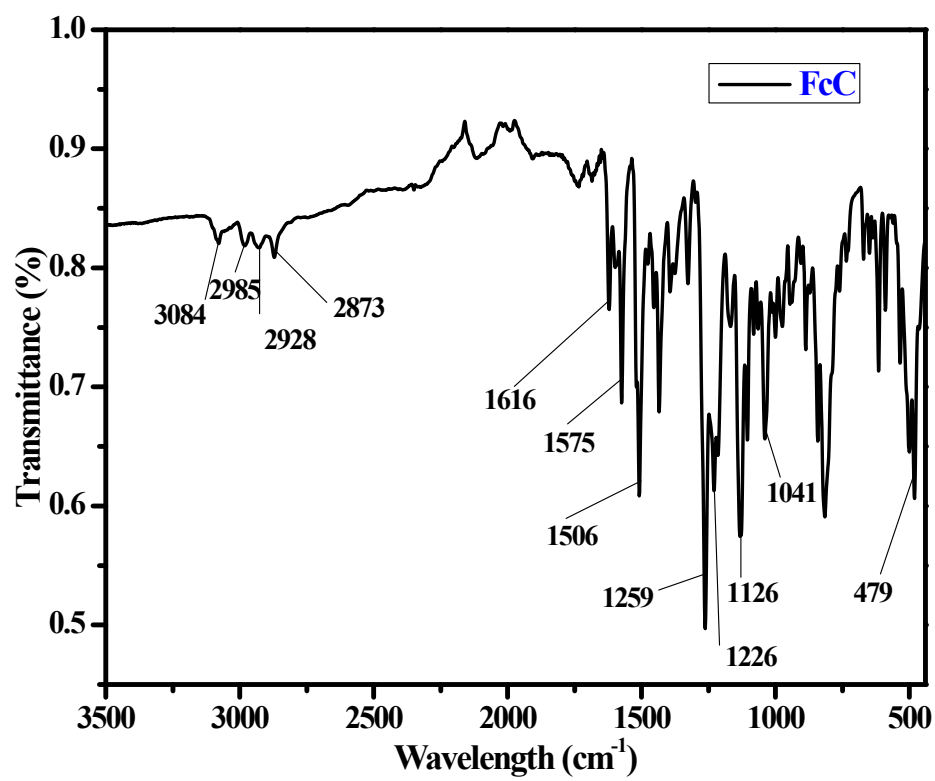

Fig. S9. FT-IR spectrum of FcC

**Table S1.** Selected Mulliken atomic charges on the corrosion inhibitors FcA, FcB and FcC calculated at GGA/PBE with a DZ basis set

| Atomic charges<br>(e) | Compounds |         |         |
|-----------------------|-----------|---------|---------|
|                       | FcA       | FcB     | FcC     |
| $q_{\text{Fe}} (12)$  | 0.4328    | 0.4233  | 0.4365  |
| $q_{\text{c}}$        | -0.3126   | -0.3121 | -0.3127 |
| $q_{\text{c}}$        | -0.3452   | -0.3129 | -0.3306 |
| $q_{\text{c}}$        | -0.2897   | -0.2944 | -0.2917 |
| $q_{\text{c}}$        | -0.0993   | -0.1100 | -0.1032 |
| $q_{\text{N}} (23)$   | -0.3831   | -0.3962 | -0.3920 |
| $q_{\text{c}}$        | -0.0863   | -0.0597 | -0.0568 |
| $q_{\text{c}}$        | -0.1522   | -0.1390 | -0.1476 |
| $q_{\text{O}} (35)$   | -0.5903   | -0.5864 | -0.5976 |
| $q_{\text{c}}$        | -0.1517   | -0.0906 | -0.0673 |
| $q_{\text{O}} (39)$   | -0.5976   | -0.5708 | -0.6137 |
| $q_{\text{c}}$        | 0.2222    | 0.2402  | 0.2619  |
| $q_{\text{c}}$        | -0.3089   | 0.2612  | 0.1778  |
| $q_{\text{c}}$        | -0.0814   | -0.0579 | -0.0656 |
| $q_{\text{N}} (50)$   | -0.3794   | -0.3860 | -0.3886 |
| $q_{\text{c}}$        | -0.0177   | -0.0448 | -0.0380 |
| $q_{\text{c}}$        | -0.2455   | -0.2582 | -0.2425 |
| $q_{\text{Fe}} (73)$  | 0.4646    | 0.4463  | 0.3928  |
| $q_{\text{c}}$        | -0.3101   | -0.3144 | -0.3183 |
| $q_{\text{c}}$        | -0.3321   | -0.3561 | -0.3088 |
| $q_{\text{c}}$        | -0.3277   | -0.3295 | -0.3074 |
| $q_{\text{O}} (89)$   | -----     | -0.6063 | -0.5929 |
| $q_{\text{O}} (90)$   | -----     | -0.6009 | -0.5737 |
| $q_{\text{c}}$        | -----     | -0.5616 | -0.3657 |

|       |      |         |         |
|-------|------|---------|---------|
| $q_c$ | ---- | -0.5258 | -0.3372 |
| $q_c$ | ---- | ---     | -0.8215 |
| $q_c$ | ---  | ---     | -0.7842 |

## APPENDIX I

Computational output data obtained from ADF software at GGA/PBE level of theory with a DZ basis set.

### Coordinates of Optimized Compound 1 (FcA)

| Atom | angstrom        |                 |                 |
|------|-----------------|-----------------|-----------------|
|      | X               | Y               | Z               |
| 1 Fe | -7.304069499331 | 11.055934759635 | -1.022428270545 |
| 2 C  | -8.648924971795 | 10.939642595774 | 0.549854924065  |
| 3 C  | -7.490492257419 | 9.282327940959  | -2.094823840164 |
| 4 C  | -8.929461141325 | 12.103473686998 | -0.253516542039 |
| 5 C  | -7.295129013373 | 11.050982292499 | 1.066576939684  |
| 6 C  | -6.136680935612 | 9.441557513710  | -1.619844586142 |
| 7 C  | -7.802970548438 | 10.411511294918 | -2.940602739509 |
| 8 C  | -7.751781232757 | 12.937578540018 | -0.256462766947 |
| 9 C  | -6.743250018678 | 12.291311154310 | 0.546427599885  |
| 10 C | -5.610842363190 | 10.668610895247 | -2.171588104144 |
| 11 C | -6.640731889035 | 11.267198603311 | -2.990256018390 |
| 12 H | -9.341379112881 | 10.120669044051 | 0.731726127359  |
| 13 H | -8.157192977595 | 8.453839014858  | -1.861454031529 |
| 14 H | -9.867317526580 | 12.317041705546 | -0.762918492724 |
| 15 H | -2.220799843733 | 3.006983498732  | -0.644945397884 |
| 16 H | -5.614301847612 | 8.769903724753  | -0.939763426217 |
| 17 H | -8.744462652717 | 10.580932193304 | -3.459994970840 |
| 18 H | -7.646320026514 | 13.897003826098 | -0.760137201035 |
| 19 H | -0.723233283776 | 3.204954308095  | -1.698875181912 |



|      |                 |                 |                 |
|------|-----------------|-----------------|-----------------|
| 20 H | -4.609259066819 | 11.065337664867 | -2.014058450022 |
| 21 H | -6.553029935432 | 12.194876414032 | -3.553481342825 |
| 22 C | -6.609863335936 | 10.070507178027 | 1.924413108849  |
| 23 C | -7.350802592154 | 9.114786072923  | 2.660676430818  |
| 24 C | -6.717827244975 | 8.197898095202  | 3.504275256115  |
| 25 C | -5.311296354682 | 8.180597206714  | 3.611639202807  |
| 26 C | -4.556680364839 | 9.140507601428  | 2.896962665324  |
| 27 C | -5.200638719759 | 10.069046686368 | 2.074532372601  |
| 28 H | -8.441253232165 | 9.124029716227  | 2.612506036872  |
| 29 H | -7.296414820968 | 7.498822105764  | 4.111199995577  |
| 30 H | -5.758781993850 | 12.698079950969 | 0.768460683399  |
| 31 H | -3.470406645412 | 9.162931803631  | 3.012760674098  |
| 32 H | -4.599299731729 | 10.803339513924 | 1.534832560575  |
| 33 N | -4.719399298238 | 7.297977795169  | 4.552228800294  |
| 34 C | -3.733222962338 | 6.488424705124  | 4.317683398196  |
| 35 C | -3.071045050425 | 6.114069870555  | 3.045357363182  |
| 36 C | -3.703657205149 | 6.189020295945  | 1.782171602293  |
| 37 C | -3.042028961991 | 5.740766305929  | 0.632692224361  |
| 38 C | -1.746333798675 | 5.218801530817  | 0.742549835909  |
| 39 C | -1.093282240470 | 5.138186406736  | 1.976996729719  |
| 40 C | -1.765684844375 | 5.576540874262  | 3.124114846347  |
| 41 H | -4.716892931020 | 6.584545591506  | 1.701667633627  |
| 42 H | -3.513235949138 | 5.802164171238  | -0.350266650751 |
| 43 O | -1.073362777161 | 4.782181408953  | -0.443450452352 |
| 44 H | -0.081775645418 | 4.733187283392  | 2.033270187700  |
| 45 H | -1.271927661266 | 5.502953621229  | 4.097010742203  |
| 46 C | -1.177110540603 | 3.339268554256  | -0.708494602949 |
| 47 O | -0.498374393918 | 2.528038816292  | 0.296865101841  |
| 48 C | 0.916694691021  | 2.566621436181  | 0.361262735745  |
| 49 C | 1.492093782966  | 1.560165711130  | 1.158031972387  |

|       |                |                 |                 |
|-------|----------------|-----------------|-----------------|
| 50 C  | 2.877354469058 | 1.499792176897  | 1.301733453339  |
| 51 C  | 3.711312699681 | 2.448195390102  | 0.658469832487  |
| 52 C  | 3.105220348283 | 3.471048278334  | -0.101110332700 |
| 53 C  | 1.712246699711 | 3.538816302824  | -0.263265806215 |
| 54 H  | 0.832984873062 | 0.841951900299  | 1.648068573788  |
| 55 H  | 3.319025836671 | 0.718718635800  | 1.921584278846  |
| 56 C  | 5.185567697095 | 2.452762273471  | 0.797147475036  |
| 57 H  | 3.731133240253 | 4.231796957858  | -0.575927482775 |
| 58 H  | 1.265450490741 | 4.358190477286  | -0.826278002696 |
| 59 N  | 6.001980867603 | 1.466318101865  | 1.019675826930  |
| 60 C  | 5.620773138076 | 0.096659176131  | 1.004494107700  |
| 61 C  | 6.003956547397 | -0.728896405593 | 2.083041367504  |
| 62 C  | 5.689556179130 | -2.090264813938 | 2.074836665928  |
| 63 C  | 5.026412695174 | -2.685571628084 | 0.973746621352  |
| 64 C  | 4.703027824253 | -1.855859023052 | -0.126233295633 |
| 65 C  | 4.982948063463 | -0.486437590183 | -0.112749161946 |
| 66 H  | 6.551957840264 | -0.282581764524 | 2.915189897486  |
| 67 H  | 5.970095645630 | -2.702912231393 | 2.933348154135  |
| 68 H  | 4.735775333871 | 0.137161692947  | -0.974811058503 |
| 69 H  | 4.249684403742 | -2.294247025712 | -1.017070351399 |
| 70 Fe | 3.181100864606 | -5.025600518123 | 2.050774810774  |
| 71 C  | 3.758087998841 | -4.784256539893 | 0.076658856098  |
| 72 C  | 1.291618678825 | -4.166684866667 | 2.231980387429  |
| 73 C  | 3.728450419274 | -6.186797241394 | 0.409761761830  |
| 74 C  | 4.706590864147 | -4.121906576231 | 0.956583237761  |
| 75 C  | 2.237155786870 | -3.488086167355 | 3.085993957410  |
| 76 C  | 1.247914075606 | -5.555776030386 | 2.629024781581  |
| 77 C  | 4.644385497581 | -6.405391286583 | 1.503098899665  |
| 78 C  | 5.240840846495 | -5.138513211586 | 1.847306568186  |
| 79 C  | 2.776555572906 | -4.455029632875 | 4.012025091724  |

|      |                 |                 |                 |
|------|-----------------|-----------------|-----------------|
| 80 C | 2.163624301473  | -5.733667201021 | 3.730994635267  |
| 81 H | 3.165029837315  | -4.312334378179 | -0.703551200893 |
| 82 H | 0.709085313457  | -3.711366739287 | 1.432967018833  |
| 83 H | 3.124071484592  | -6.946783164285 | -0.082499438789 |
| 84 H | -3.335415901985 | 5.971270473456  | 5.202254084355  |
| 85 H | 2.518320697016  | -2.437728151801 | 3.023481412893  |
| 86 H | 0.622328470834  | -6.328917146878 | 2.185959667074  |
| 87 H | 4.860688697485  | -7.361487479413 | 1.976588812027  |
| 88 H | 6.002551146207  | -4.987397437910 | 2.608925942821  |
| 89 H | 3.505314083084  | -4.253750670818 | 4.795212337189  |
| 90 H | 2.351379897917  | -6.664738260423 | 4.263230320658  |
| 91 H | 5.655982384670  | 3.442694295962  | 0.716780272568  |

**Coordinates of Optimized Compound 2 (FcB)**

| Atom | angstrom   |           |           |
|------|------------|-----------|-----------|
|      | X          | Y         | Z         |
| 1 Fe | -7.547434  | 10.123398 | -1.294159 |
| 2 C  | -8.671483  | 9.264950  | 0.219626  |
| 3 C  | -6.627499  | 8.558191  | -2.310685 |
| 4 C  | -9.526258  | 10.030327 | -0.654878 |
| 5 C  | -7.675124  | 10.157217 | 0.789031  |
| 6 C  | -5.634927  | 9.445089  | -1.752150 |
| 7 C  | -7.451025  | 9.324336  | -3.219639 |
| 8 C  | -9.063217  | 11.396781 | -0.646218 |
| 9 C  | -7.920788  | 11.476320 | 0.230022  |
| 10 C | -5.845189  | 10.759132 | -2.311879 |
| 11 C | -6.967689  | 10.684865 | -3.218949 |
| 12 H | -8.770607  | 8.200080  | 0.416544  |
| 13 H | -6.733085  | 7.496994  | -2.092057 |
| 14 H | -10.376545 | 9.644885  | -1.214733 |
| 15 H | -1.841596  | 2.562872  | 1.261089  |

|      |           |           |           |
|------|-----------|-----------|-----------|
| 16 H | -4.882233 | 9.180520  | -1.011045 |
| 17 H | -8.283663 | 8.942171  | -3.807782 |
| 18 H | -9.505320 | 12.227210 | -1.194043 |
| 19 H | -0.815166 | 2.412005  | -0.264991 |
| 20 H | -5.252998 | 11.647492 | -2.098515 |
| 21 H | -7.369897 | 11.507272 | -3.808338 |
| 22 C | -6.601069 | 9.785425  | 1.725471  |
| 23 C | -6.613727 | 8.537407  | 2.393137  |
| 24 C | -5.611680 | 8.185651  | 3.302734  |
| 25 C | -4.565185 | 9.089763  | 3.593696  |
| 26 C | -4.555360 | 10.351136 | 2.958807  |
| 27 C | -5.545377 | 10.679635 | 2.028754  |
| 28 H | -7.436407 | 7.841103  | 2.222322  |
| 29 H | -5.651469 | 7.230362  | 3.830878  |
| 30 H | -7.377673 | 12.387994 | 0.468800  |
| 31 H | -3.771660 | 11.065117 | 3.220264  |
| 32 H | -5.505143 | 11.654408 | 1.539557  |
| 33 N | -3.629303 | 8.818328  | 4.624317  |
| 34 C | -2.748896 | 7.863041  | 4.628161  |
| 35 C | -2.323773 | 6.932367  | 3.558391  |
| 36 C | -2.678645 | 7.062707  | 2.189065  |
| 37 C | -2.184559 | 6.155253  | 1.249973  |
| 38 C | -1.327331 | 5.114095  | 1.639896  |
| 39 C | -0.948027 | 5.007641  | 2.987820  |
| 40 C | -1.438255 | 5.900170  | 3.936355  |
| 41 H | -3.326625 | 7.873911  | 1.859505  |
| 42 H | -2.431045 | 6.243735  | 0.190381  |
| 43 O | -0.811261 | 4.283006  | 0.581632  |
| 44 O | -0.016506 | 4.020628  | 3.437996  |
| 45 H | -1.014310 | 5.760824  | 4.943533  |

|       |           |           |           |
|-------|-----------|-----------|-----------|
| 46 C  | -0.919160 | 2.844737  | 0.735858  |
| 47 O  | 0.174419  | 2.318438  | 1.594155  |
| 48 C  | 1.473999  | 2.126411  | 0.994742  |
| 49 C  | 2.225935  | 1.070265  | 1.509723  |
| 50 C  | 3.521066  | 0.878048  | 1.015724  |
| 51 C  | 4.064220  | 1.707670  | 0.010549  |
| 52 C  | 3.256336  | 2.773029  | -0.479459 |
| 53 C  | 1.960483  | 3.000348  | 0.017876  |
| 54 H  | 1.803006  | 0.432134  | 2.285586  |
| 55 H  | 4.130047  | 0.075040  | 1.430602  |
| 56 C  | 5.464753  | 1.602200  | -0.464416 |
| 57 O  | 3.845960  | 3.562140  | -1.468719 |
| 58 H  | 1.360960  | 3.852344  | -0.297719 |
| 59 N  | 6.236859  | 0.553024  | -0.498919 |
| 60 C  | 5.741669  | -0.755124 | -0.231063 |
| 61 C  | 6.319402  | -1.515442 | 0.804989  |
| 62 C  | 5.789736  | -2.770730 | 1.128907  |
| 63 C  | 4.706395  | -3.318179 | 0.403057  |
| 64 C  | 4.211006  | -2.586776 | -0.703755 |
| 65 C  | 4.714888  | -1.323652 | -1.018413 |
| 66 H  | 7.169199  | -1.102614 | 1.352169  |
| 67 H  | 6.241563  | -3.350789 | 1.936240  |
| 68 H  | 4.317418  | -0.756331 | -1.863028 |
| 69 H  | 3.396677  | -3.002103 | -1.301193 |
| 70 Fe | 2.151309  | -4.871131 | 1.442003  |
| 71 C  | 3.405885  | -5.537565 | -0.070124 |
| 72 C  | 0.513716  | -3.937899 | 0.556395  |
| 73 C  | 2.962618  | -6.651791 | 0.730015  |
| 74 C  | 4.115332  | -4.609519 | 0.793222  |
| 75 C  | 1.252648  | -2.995364 | 1.364505  |

|      |           |           |           |
|------|-----------|-----------|-----------|
| 76 C | 0.068164  | -5.010998 | 1.415406  |
| 77 C | 3.382853  | -6.422715 | 2.091383  |
| 78 C | 4.085499  | -5.164211 | 2.134991  |
| 79 C | 1.265902  | -3.486807 | 2.722161  |
| 80 C | 0.535480  | -4.733735 | 2.753028  |
| 81 H | 3.286661  | -5.440140 | -1.147435 |
| 82 H | 0.311961  | -3.849900 | -0.509915 |
| 83 H | 2.422088  | -7.523318 | 0.364860  |
| 84 H | -2.190558 | 7.747040  | 5.566613  |
| 85 H | 1.739486  | -2.090274 | 1.003564  |
| 86 H | -0.524869 | -5.871394 | 1.110242  |
| 87 H | 3.202587  | -7.083836 | 2.937100  |
| 88 H | 4.509576  | -4.704946 | 3.025653  |
| 89 H | 1.740444  | -3.004331 | 3.574977  |
| 90 H | 0.355499  | -5.348040 | 3.633634  |
| 91 H | 5.910123  | 2.542678  | -0.803442 |
| 92 H | 0.604999  | 3.293993  | 5.322723  |
| 93 H | 1.802499  | 4.371501  | 4.458313  |
| 94 H | 0.161972  | 3.232853  | 2.772138  |
| 95 C | 3.098459  | 4.734881  | -1.977137 |
| 96 C | 0.762610  | 4.282447  | 4.840436  |
| 97 H | 3.780572  | 5.183116  | -2.707678 |
| 98 H | 2.170181  | 4.406874  | -2.470116 |
| 99 H | 2.891262  | 5.441895  | -1.159000 |

**Coordinates of Optimized Compound 3 (FcC)**

| Atom | angstrom  |          |           |
|------|-----------|----------|-----------|
|      | X         | Y        | Z         |
| 1 Fe | -5.437895 | 8.100568 | -0.310547 |
| 2 C  | -7.173713 | 6.961226 | -0.291804 |

|      |           |           |           |
|------|-----------|-----------|-----------|
| 3 C  | -4.008045 | 7.009951  | -1.365366 |
| 4 C  | -7.436142 | 8.248115  | -0.887178 |
| 5 C  | -6.702260 | 7.171141  | 1.063741  |
| 6 C  | -3.552412 | 7.265753  | -0.018398 |
| 7 C  | -4.234509 | 8.283356  | -2.010498 |
| 8 C  | -7.120980 | 9.263915  | 0.088748  |
| 9 C  | -6.661789 | 8.605932  | 1.287403  |
| 10 C | -3.499034 | 8.698706  | 0.168075  |
| 11 C | -3.917791 | 9.326515  | -1.065064 |
| 12 H | -7.299150 | 5.996695  | -0.780522 |
| 13 H | -4.156869 | 6.030742  | -1.817655 |
| 14 H | -7.812742 | 8.421111  | -1.893664 |
| 15 H | -0.967064 | 6.015956  | -0.798783 |
| 16 H | -3.329123 | 6.513796  | 0.737506  |
| 17 H | -4.576390 | 8.430031  | -3.033513 |
| 18 H | -7.227104 | 10.338913 | -0.047328 |
| 19 H | 0.797956  | 5.803354  | -1.298361 |
| 20 H | -3.183528 | 9.216831  | 1.072197  |
| 21 H | -3.980098 | 10.397756 | -1.248847 |
| 22 C | -6.268820 | 6.119295  | 1.998230  |
| 23 C | -6.816403 | 4.817820  | 1.941629  |
| 24 C | -6.323606 | 3.788561  | 2.755278  |
| 25 C | -5.237644 | 4.035494  | 3.614505  |
| 26 C | -4.751479 | 5.354208  | 3.755586  |
| 27 C | -5.266167 | 6.377317  | 2.962055  |
| 28 H | -7.652103 | 4.615754  | 1.267720  |
| 29 H | -6.756470 | 2.786570  | 2.720295  |
| 30 H | -6.391053 | 9.097411  | 2.219791  |
| 31 H | -3.953888 | 5.550384  | 4.475114  |
| 32 H | -4.856738 | 7.385556  | 3.054054  |

|      |           |           |           |
|------|-----------|-----------|-----------|
| 33 N | -4.651623 | 2.966986  | 4.362406  |
| 34 C | -3.393420 | 2.670124  | 4.196803  |
| 35 C | -2.464755 | 3.236604  | 3.186862  |
| 36 C | -2.870979 | 3.478195  | 1.857443  |
| 37 C | -1.971424 | 3.994357  | 0.916157  |
| 38 C | -0.657655 | 4.306807  | 1.299893  |
| 39 C | -0.231247 | 4.055567  | 2.626851  |
| 40 C | -1.129303 | 3.510633  | 3.550047  |
| 41 H | -3.888269 | 3.241816  | 1.543326  |
| 42 H | -2.280523 | 4.112788  | -0.121387 |
| 43 O | 0.320117  | 4.843222  | 0.427217  |
| 44 O | 1.110028  | 4.239336  | 3.015188  |
| 45 H | -0.763246 | 3.292999  | 4.554950  |
| 46 C | -0.103149 | 5.343778  | -0.878881 |
| 47 O | -0.576703 | 4.247229  | -1.744748 |
| 48 C | 0.399637  | 3.268746  | -2.064651 |
| 49 C | 0.170665  | 1.953210  | -1.641633 |
| 50 C | 1.076946  | 0.941647  | -1.969510 |
| 51 C | 2.234166  | 1.241486  | -2.725488 |
| 52 C | 2.445594  | 2.569110  | -3.155476 |
| 53 C | 1.540044  | 3.582129  | -2.822736 |
| 54 H | -0.727417 | 1.743302  | -1.058143 |
| 55 H | 0.889423  | -0.080010 | -1.638129 |
| 56 C | 3.212911  | 0.196075  | -3.119264 |
| 57 O | 1.771034  | 4.932218  | -3.186325 |
| 58 N | 3.572314  | -0.874940 | -2.476924 |
| 59 C | 3.182373  | -1.135468 | -1.129136 |
| 60 C | 3.504489  | -0.227661 | -0.095300 |
| 61 C | 3.165823  | -0.521915 | 1.227221  |
| 62 C | 2.482725  | -1.716223 | 1.559318  |



|       |           |           |           |
|-------|-----------|-----------|-----------|
| 63 C  | 2.188509  | -2.626435 | 0.517388  |
| 64 C  | 2.555552  | -2.356001 | -0.808342 |
| 65 H  | 4.023822  | 0.700858  | -0.342910 |
| 66 H  | 3.405904  | 0.194572  | 2.015860  |
| 67 H  | 2.371225  | -3.081552 | -1.603256 |
| 68 H  | 1.715966  | -3.581054 | 0.759497  |
| 69 Fe | 0.989469  | -0.860169 | 4.260450  |
| 70 C  | 0.959359  | -2.757624 | 3.406624  |
| 71 C  | -0.772877 | 0.097564  | 3.686148  |
| 72 C  | 1.013515  | -2.859354 | 4.844887  |
| 73 C  | 2.128704  | -2.027057 | 2.955705  |
| 74 C  | 0.371301  | 0.822420  | 3.192361  |
| 75 C  | -0.678290 | 0.041338  | 5.127926  |
| 76 C  | 2.210674  | -2.189211 | 5.294833  |
| 77 C  | 2.895857  | -1.669884 | 4.136824  |
| 78 C  | 1.177869  | 1.213859  | 4.321573  |
| 79 C  | 0.528187  | 0.735231  | 5.521629  |
| 80 H  | 0.168261  | -3.147630 | 2.768788  |
| 81 H  | -1.573070 | -0.324032 | 3.080588  |
| 82 H  | 0.281313  | -3.357611 | 5.477935  |
| 83 H  | -2.960966 | 1.947078  | 4.900300  |
| 84 H  | 0.592598  | 1.036224  | 2.148105  |
| 85 H  | -1.388176 | -0.440343 | 5.798304  |
| 86 H  | 2.548586  | -2.105331 | 6.326315  |
| 87 H  | 3.854324  | -1.154466 | 4.135639  |
| 88 H  | 2.084503  | 1.811530  | 4.274615  |
| 89 H  | 0.883374  | 0.870307  | 6.541896  |
| 90 H  | 3.677780  | 0.336712  | -4.104760 |
| 91 C  | 1.623724  | 5.654128  | 2.942914  |
| 92 H  | 3.196893  | 5.134138  | 1.560420  |

|       |           |          |           |
|-------|-----------|----------|-----------|
| 93 H  | 3.601667  | 4.880545 | 3.293287  |
| 94 C  | 1.573792  | 5.216605 | -4.652794 |
| 95 C  | 0.107574  | 5.087481 | -5.046364 |
| 96 C  | 3.100987  | 5.554413 | 2.574754  |
| 97 H  | 1.464939  | 6.092258 | 3.942782  |
| 98 H  | 1.055501  | 6.212121 | 2.186022  |
| 99 H  | 3.588933  | 6.544944 | 2.617900  |
| 100 H | 2.210987  | 4.524285 | -5.228958 |
| 101 H | 1.951061  | 6.242735 | -4.755947 |
| 102 H | -0.509945 | 5.772273 | -4.445863 |
| 103 H | -0.252327 | 4.057887 | -4.884938 |
| 104 H | -0.015351 | 5.335415 | -6.114796 |
| 105 H | 3.343595  | 2.831936 | -3.720422 |

## APPENDIX II

Computational output data obtained from Gaussian 09 software at DFT/B3LYP/6-31G

**Table S2.** Computed quantum mechanical parameters and reactivity descriptors of ferrocenyl

Schiff bases computed in Gaussian 09 at DFT/B3LYP/6-31G level in gas phase

| <b>Corrosion Inhibitors</b> | <b>E<sub>HOMO</sub></b><br>/ eV | <b>E<sub>LUMO</sub></b><br>/ eV | <b>ΔE</b><br>/eV | <b>I</b><br>/ eV | <b>A</b><br>/eV | <b>η</b><br>/ eV | <b>χ</b><br>/ eV | <b>σ</b><br>/eV <sup>-1</sup> | <b>μ</b><br>/D |
|-----------------------------|---------------------------------|---------------------------------|------------------|------------------|-----------------|------------------|------------------|-------------------------------|----------------|
| FcA                         | -5.200                          | -1.684                          | 3.515            | 5.200            | 1.684           | 1.757            | 3.442            | 0.569                         | 2.388          |
| FcB                         | -5.210                          | -1.697                          | 3.510            | 5.210            | 1.697           | 1.755            | 3.455            | 0.569                         | 3.437          |
| FcC                         | -5.200                          | -1.697                          | 3.502            | 5.200            | 1.697           | 1.749            | 3.428            | 0.571                         | 3.397          |

**Table S3.** Selected Mulliken atomic charges on the corrosion inhibitors FcA, FcB and FcC calculated at DFT/B3LYP with a 6-31G basis set

| Atomic charges<br>(e) | Compounds    |              |              |
|-----------------------|--------------|--------------|--------------|
|                       | FcA          | FcB          | FcC          |
| $q_{Fe}$              | 0.6247 (12)  | 0.6239 (12)  | 0.6243 (12)  |
| $q_c$                 | -0.20656 (1) | -0.2065(1)   | -0.2063 (1)  |
| $q_c$                 | -0.2092 (3)  | -0.2065(3)   | -0.2063 (3)  |
| $q_c$                 | -0.2101 (4)  | -0.2099(4)   | -0.2100 (4)  |
| $q_c$                 | -0.2132(5)   | -0.2128(5)   | -0.2128 (5)  |
| $q_N$                 | -0.4244 (23) | -0.4173 (23) | -0.4182 (23) |
| $q_c$                 | -0.1644(14)  | -0.1645(14)  | -0.1645(14)  |
| $q_c$                 | -0.1174(15)  | -0.1172(15)  | -0.1179(15)  |
| $q_O$                 | -0.5465 (35) | -0.5560 (35) | -0.5588 (35) |
| $q_c$                 | 0.2295(36)   | 0.2387(36)   | 0.2379(36)   |
| $q_O$                 | -0.5473(39)  | -0.5599(39)  | -0.5557(39)  |
| $q_c$                 | 0.2777(40)   | 0.2978(40)   | 0.2914(40)   |
| $q_c$                 | -0.1292(41)  | 0.2573(41)   | 0.2594(41)   |
| $q_c$                 | -0.1639(42)  | -0.1710(42)  | -0.1691(42)  |
| $q_N$                 | -0.4252(50)  | -0.4256(50)  | -0.4256(50)  |
| $q_c$                 | 0.1388(52)   | 0.1367(52)   | 0.1376(52)   |
| $q_c$                 | -0.1761(53)  | -0.1767(53)  | -0.1766(53)  |
| $q_{Fe}$              | 0.6249(73)   | 0.6241(73)   | 0.6243(73)   |
| $q_c$                 | -0.2098(72)  | -0.2099(72)  | -0.2099(72)  |
| $q_c$                 | -0.2096(71)  | -0.2094(71)  | -0.2093(71)  |
| $q_O$                 | -----        | -0.5601(90)  | -0.5614(90)  |
| $q_O$                 | -----        | -0.5516(91)  | -0.5601(91)  |
| $q_c$                 | -----        | -0.1841(92)  | -0.0179(92)  |
| $q_c$                 | ----         | -0.1778(93)  | -0.0329(93)  |

### Coordinates of Compound 1 (FcA)

| Center | Atomic nr | X          | Y         | Z         |
|--------|-----------|------------|-----------|-----------|
| 1      | 6         | -12.847296 | -1.924934 | 1.950903  |
| 2      | 1         | -11.861446 | -1.560931 | 2.194681  |
| 3      | 6         | -14.081137 | -1.222027 | 2.157913  |
| 4      | 6         | -15.151414 | -2.055717 | 1.688006  |
| 5      | 6         | -13.154551 | -3.193601 | 1.353738  |
| 6      | 6         | -14.578947 | -3.274597 | 1.191211  |
| 7      | 6         | -12.550755 | -0.557131 | -1.116626 |
| 8      | 6         | -13.786701 | 0.155430  | -0.894400 |
| 9      | 6         | -14.872339 | -0.655598 | -1.359444 |
| 10     | 6         | -12.901299 | -1.827067 | -1.710241 |
| 11     | 6         | -14.324653 | -1.881793 | -1.863587 |
| 12     | 26        | -13.825136 | -1.645836 | 0.136672  |
| 13     | 6         | -11.190873 | -0.055970 | -0.862942 |
| 14     | 6         | -10.936898 | 1.326989  | -0.752189 |
| 15     | 6         | -9.653024  | 1.808086  | -0.509120 |
| 16     | 6         | -8.562939  | 0.926045  | -0.401345 |
| 17     | 6         | -8.806713  | -0.459373 | -0.501457 |
| 18     | 6         | -10.097081 | -0.935654 | -0.722196 |
| 19     | 1         | -11.754364 | 2.030129  | -0.869305 |
| 20     | 1         | -9.463249  | 2.871382  | -0.414518 |
| 21     | 1         | -7.991741  | -1.163176 | -0.365165 |
| 22     | 1         | -10.264852 | -2.007041 | -0.766226 |
| 23     | 7         | -7.290210  | 1.486335  | -0.156546 |
| 24     | 6         | -6.199089  | 0.939924  | -0.582550 |
| 25     | 1         | -6.209365  | 0.042224  | -1.217065 |
| 26     | 6         | -4.877258  | 1.479737  | -0.269084 |
| 27     | 6         | -4.722220  | 2.626877  | 0.542656  |

|    |   |           |           |           |
|----|---|-----------|-----------|-----------|
| 28 | 6 | -3.460519 | 3.123748  | 0.832487  |
| 29 | 6 | -2.321028 | 2.481367  | 0.317098  |
| 30 | 6 | -2.448380 | 1.344620  | -0.491667 |
| 31 | 6 | -3.726875 | 0.854661  | -0.776968 |
| 32 | 1 | -5.613362 | 3.105868  | 0.931024  |
| 33 | 1 | -1.580846 | 0.840412  | -0.900272 |
| 34 | 1 | -3.829749 | -0.026712 | -1.404022 |
| 35 | 8 | -1.104960 | 3.058395  | 0.672547  |
| 36 | 6 | 0.108494  | 2.453438  | 0.218457  |
| 37 | 1 | 0.180353  | 1.413054  | 0.566611  |
| 38 | 1 | 0.177210  | 2.493184  | -0.878011 |
| 39 | 8 | 1.123861  | 3.260702  | 0.820694  |
| 40 | 6 | 2.459777  | 2.914657  | 0.635602  |
| 41 | 6 | 3.387213  | 3.728081  | 1.302060  |
| 42 | 6 | 4.745872  | 3.458469  | 1.180475  |
| 43 | 6 | 5.205738  | 2.379565  | 0.396310  |
| 44 | 6 | 4.258891  | 1.577238  | -0.266657 |
| 45 | 6 | 2.893498  | 1.836734  | -0.153786 |
| 46 | 1 | 5.464881  | 4.087446  | 1.697732  |
| 47 | 1 | 4.617343  | 0.750416  | -0.869148 |
| 48 | 1 | 2.187320  | 1.202870  | -0.677055 |
| 49 | 6 | 6.639335  | 2.112485  | 0.290576  |
| 50 | 7 | 7.116750  | 1.158509  | -0.439605 |
| 51 | 1 | 7.293115  | 2.783330  | 0.865607  |
| 52 | 6 | 11.245114 | 0.160215  | -0.682797 |
| 53 | 6 | 10.703945 | 0.650249  | 0.524329  |
| 54 | 6 | 9.359051  | 0.997537  | 0.628851  |
| 55 | 6 | 8.495291  | 0.855191  | -0.476729 |
| 56 | 6 | 9.020408  | 0.340363  | -1.675543 |
| 57 | 6 | 10.370709 | 0.017181  | -1.780493 |

|    |    |            |           |           |
|----|----|------------|-----------|-----------|
| 58 | 1  | 11.341541  | 0.740750  | 1.397761  |
| 59 | 1  | 8.966200   | 1.340826  | 1.580686  |
| 60 | 1  | 8.349712   | 0.217589  | -2.518607 |
| 61 | 1  | 10.757534  | -0.343217 | -2.727479 |
| 62 | 6  | 12.668405  | -0.195690 | -0.795229 |
| 63 | 6  | 13.739345  | 0.262347  | 0.060084  |
| 64 | 6  | 14.977817  | -0.253915 | -0.441915 |
| 65 | 6  | 13.274001  | -1.015089 | -1.818808 |
| 66 | 6  | 14.690320  | -1.043304 | -1.604463 |
| 67 | 6  | 12.324977  | -2.936961 | 1.133888  |
| 68 | 1  | 11.272774  | -2.719946 | 1.231715  |
| 69 | 6  | 13.368242  | -2.463906 | 1.998664  |
| 70 | 6  | 14.616987  | -2.976721 | 1.509668  |
| 71 | 6  | 12.928137  | -3.742670 | 0.111047  |
| 72 | 6  | 14.344903  | -3.767207 | 0.342945  |
| 73 | 26 | 13.696771  | -1.810236 | 0.050512  |
| 74 | 1  | 15.075297  | -4.297329 | -0.248000 |
| 75 | 1  | 15.587464  | -2.809314 | 1.950009  |
| 76 | 1  | 13.236662  | -1.843321 | 2.871192  |
| 77 | 1  | 12.406430  | -4.248390 | -0.686182 |
| 78 | 1  | 13.631944  | 0.918946  | 0.908990  |
| 79 | 1  | 15.955662  | -0.068022 | -0.026222 |
| 80 | 1  | 15.413013  | -1.563664 | -2.213198 |
| 81 | 1  | 12.750991  | -1.520747 | -2.615188 |
| 82 | 1  | -14.883808 | -2.696195 | -2.296801 |
| 83 | 1  | -12.204985 | -2.587368 | -2.027351 |
| 84 | 1  | -15.917291 | -0.388599 | -1.337834 |
| 85 | 1  | -15.124002 | -4.109586 | 0.779659  |
| 86 | 1  | -16.202407 | -1.814072 | 1.715483  |
| 87 | 1  | -14.185867 | -0.242638 | 2.597688  |

|    |   |            |           |           |
|----|---|------------|-----------|-----------|
| 88 | 1 | -12.442175 | -3.958319 | 1.086558  |
| 89 | 1 | 3.019108   | 4.551723  | 1.901515  |
| 90 | 1 | -3.321492  | 4.000754  | 1.453200  |
| 91 | 1 | -13.879905 | 1.134978  | -0.452466 |

**Coordinates of Compound 2 (FcB)**

| Center | Atomic nr | X          | Y         | Z         |
|--------|-----------|------------|-----------|-----------|
| -----  |           |            |           |           |
| 1      | 6         | -11.759679 | -3.729283 | 0.546077  |
| 2      | 1         | -10.737457 | -3.399916 | 0.647710  |
| 3      | 6         | -12.746319 | -3.746745 | 1.588066  |
| 4      | 6         | -13.972206 | -4.244243 | 1.030115  |
| 5      | 6         | -12.374956 | -4.215899 | -0.655798 |
| 6      | 6         | -13.743012 | -4.533768 | -0.356676 |
| 7      | 6         | -12.651302 | -0.579569 | -0.270350 |
| 8      | 6         | -13.633973 | -0.608634 | 0.787048  |
| 9      | 6         | -14.868427 | -1.100429 | 0.251383  |
| 10     | 6         | -13.303056 | -1.078049 | -1.459964 |
| 11     | 6         | -14.663572 | -1.390788 | -1.138125 |
| 12     | 26        | -13.370884 | -2.521882 | 0.026429  |
| 13     | 6         | -11.273837 | -0.071315 | -0.174133 |
| 14     | 6         | -10.907735 | 0.845348  | 0.833716  |
| 15     | 6         | -9.612090  | 1.349207  | 0.915087  |
| 16     | 6         | -8.622669  | 0.938297  | 0.004456  |
| 17     | 6         | -8.982900  | 0.038786  | -1.020102 |
| 18     | 6         | -10.283046 | -0.453768 | -1.102561 |
| 19     | 1         | -11.656178 | 1.187701  | 1.540164  |
| 20     | 1         | -9.337957  | 2.067075  | 1.679932  |
| 21     | 1         | -8.251440  | -0.251598 | -1.767612 |
| 22     | 1         | -10.535564 | -1.147735 | -1.897766 |

|    |   |           |           |           |
|----|---|-----------|-----------|-----------|
| 23 | 7 | -7.331905 | 1.491970  | 0.148875  |
| 24 | 6 | -6.263534 | 0.850978  | -0.192142 |
| 25 | 1 | -6.299561 | -0.185957 | -0.555183 |
| 26 | 6 | -4.928851 | 1.443313  | -0.107403 |
| 27 | 6 | -4.739821 | 2.764428  | 0.346473  |
| 28 | 6 | -3.470386 | 3.323211  | 0.422368  |
| 29 | 6 | -2.347435 | 2.550717  | 0.038262  |
| 30 | 6 | -2.523850 | 1.242079  | -0.425313 |
| 31 | 6 | -3.807362 | 0.693239  | -0.495041 |
| 32 | 1 | -5.595481 | 3.354615  | 0.649535  |
| 33 | 1 | -1.674388 | 0.639945  | -0.724631 |
| 34 | 1 | -3.934564 | -0.325052 | -0.849936 |
| 35 | 8 | -1.103939 | 3.169112  | 0.162810  |
| 36 | 6 | 0.072210  | 2.410025  | -0.132884 |
| 37 | 1 | 0.136422  | 1.521857  | 0.510383  |
| 38 | 1 | 0.087909  | 2.118222  | -1.192466 |
| 39 | 8 | 1.132224  | 3.324563  | 0.157883  |
| 40 | 6 | 2.451797  | 2.897140  | -0.001460 |
| 41 | 6 | 3.458278  | 3.803722  | 0.396536  |
| 42 | 6 | 4.793539  | 3.417218  | 0.291176  |
| 43 | 6 | 5.157647  | 2.152987  | -0.206178 |
| 44 | 6 | 4.144494  | 1.267527  | -0.614513 |
| 45 | 6 | 2.805123  | 1.638929  | -0.514146 |
| 46 | 1 | 5.546887  | 4.127281  | 0.615331  |
| 47 | 1 | 4.426232  | 0.296142  | -1.002542 |
| 48 | 1 | 2.039664  | 0.938207  | -0.826143 |
| 49 | 6 | 6.572284  | 1.787980  | -0.288433 |
| 50 | 7 | 6.967517  | 0.652347  | -0.761480 |
| 51 | 1 | 7.281918  | 2.546954  | 0.068975  |
| 52 | 6 | 11.025067 | -0.615517 | -0.897864 |



|    |    |            |           |           |
|----|----|------------|-----------|-----------|
| 53 | 6  | 10.577671  | 0.215025  | 0.150975  |
| 54 | 6  | 9.258125   | 0.656114  | 0.214446  |
| 55 | 6  | 8.326974   | 0.270245  | -0.771851 |
| 56 | 6  | 8.757341   | -0.581700 | -1.804405 |
| 57 | 6  | 10.083316  | -1.001498 | -1.874877 |
| 58 | 1  | 11.269405  | 0.500884  | 0.936761  |
| 59 | 1  | 8.936795   | 1.266873  | 1.052136  |
| 60 | 1  | 8.033698   | -0.888269 | -2.551399 |
| 61 | 1  | 10.399593  | -1.628159 | -2.701753 |
| 62 | 6  | 12.423365  | -1.068050 | -0.972556 |
| 63 | 6  | 13.569245  | -0.415843 | -0.381181 |
| 64 | 6  | 14.749490  | -1.133134 | -0.762070 |
| 65 | 6  | 12.923822  | -2.205207 | -1.708387 |
| 66 | 6  | 14.350368  | -2.239634 | -1.582765 |
| 67 | 6  | 12.150399  | -2.979250 | 1.786050  |
| 68 | 1  | 11.126814  | -2.654910 | 1.890477  |
| 69 | 6  | 13.300785  | -2.344124 | 2.363092  |
| 70 | 6  | 14.463421  | -3.087832 | 1.968814  |
| 71 | 6  | 12.601503  | -4.116117 | 1.035299  |
| 72 | 6  | 14.031324  | -4.183184 | 1.147803  |
| 73 | 26 | 13.460618  | -2.374521 | 0.289648  |
| 74 | 1  | 14.667463  | -4.933061 | 0.704163  |
| 75 | 1  | 15.481675  | -2.869527 | 2.250160  |
| 76 | 1  | 13.292585  | -1.468634 | 2.993263  |
| 77 | 1  | 11.975146  | -4.804160 | 0.489511  |
| 78 | 1  | 13.544982  | 0.487111  | 0.208389  |
| 79 | 1  | 15.761262  | -0.874519 | -0.492002 |
| 80 | 1  | 15.008520  | -2.967771 | -2.030304 |
| 81 | 1  | 12.324929  | -2.911946 | -2.261011 |
| 82 | 1  | -15.407058 | -1.763471 | -1.825115 |

|    |   |            |           |           |
|----|---|------------|-----------|-----------|
| 83 | 1 | -12.854658 | -1.157374 | -2.437541 |
| 84 | 1 | -15.790773 | -1.225529 | 0.796612  |
| 85 | 1 | -14.467286 | -4.934202 | -1.048731 |
| 86 | 1 | -14.899243 | -4.387016 | 1.562940  |
| 87 | 1 | -12.590717 | -3.447855 | 2.612761  |
| 88 | 1 | -11.891838 | -4.335375 | -1.612732 |
| 89 | 1 | -13.468784 | -0.309757 | 1.810252  |
| 90 | 8 | 3.208433   | 5.043276  | 0.973528  |
| 91 | 8 | -3.355115  | 4.601695  | 0.959495  |
| 92 | 6 | -2.700421  | 5.644632  | 0.160604  |
| 93 | 6 | 2.258010   | 5.966138  | 0.340974  |
| 94 | 1 | -1.642124  | 5.421965  | 0.019206  |
| 95 | 1 | -3.199853  | 5.750908  | -0.809587 |
| 96 | 1 | -2.825907  | 6.557671  | 0.742261  |
| 97 | 1 | 2.488089   | 6.082656  | -0.724386 |
| 98 | 1 | 1.233349   | 5.617462  | 0.466020  |
| 99 | 1 | 2.411348   | 6.913153  | 0.858518  |

**Coordinates of Compound 3 (FcC)**

| Center | Atomic nr | X          | Y         | Z         |
|--------|-----------|------------|-----------|-----------|
| -----  |           |            |           |           |
| -----  |           |            |           |           |
| 1      | 6         | -11.731383 | -3.968533 | 0.585418  |
| 2      | 1         | -10.712678 | -3.630115 | 0.693020  |
| 3      | 6         | -12.718997 | -4.014656 | 1.625493  |
| 4      | 6         | -13.938093 | -4.517866 | 1.057952  |
| 5      | 6         | -12.339323 | -4.443090 | -0.625089 |
| 6      | 6         | -13.703610 | -4.782727 | -0.333110 |
| 7      | 6         | -12.651409 | -0.825133 | -0.218279 |
| 8      | 6         | -13.606556 | -0.865611 | 0.863858  |

|    |    |            |           |           |
|----|----|------------|-----------|-----------|
| 9  | 6  | -14.852798 | -1.357500 | 0.356534  |
| 10 | 6  | -13.331781 | -1.318062 | -1.394028 |
| 11 | 6  | -14.682622 | -1.637401 | -1.039840 |
| 12 | 26 | -13.356838 | -2.772455 | 0.083307  |
| 13 | 6  | -11.273218 | -0.314158 | -0.153650 |
| 14 | 6  | -10.868842 | 0.554996  | 0.881167  |
| 15 | 6  | -9.571853  | 1.058955  | 0.934728  |
| 16 | 6  | -8.618703  | 0.697356  | -0.034164 |
| 17 | 6  | -9.018074  | -0.154560 | -1.084665 |
| 18 | 6  | -10.319018 | -0.649221 | -1.137245 |
| 19 | 1  | -11.588583 | 0.860421  | 1.632852  |
| 20 | 1  | -9.268306  | 1.740328  | 1.721501  |
| 21 | 1  | -8.317652  | -0.406469 | -1.874582 |
| 22 | 1  | -10.601159 | -1.307065 | -1.953007 |
| 23 | 7  | -7.325216  | 1.251159  | 0.086296  |
| 24 | 6  | -6.268400  | 0.645636  | -0.344515 |
| 25 | 1  | -6.312188  | -0.364657 | -0.775219 |
| 26 | 6  | -4.935702  | 1.245110  | -0.280160 |
| 27 | 6  | -4.734995  | 2.529640  | 0.264429  |
| 28 | 6  | -3.466826  | 3.095004  | 0.325006  |
| 29 | 6  | -2.359495  | 2.364149  | -0.173386 |
| 30 | 6  | -2.547990  | 1.093487  | -0.726301 |
| 31 | 6  | -3.829581  | 0.537285  | -0.776407 |
| 32 | 1  | -5.579189  | 3.083275  | 0.655480  |
| 33 | 1  | -1.709107  | 0.526153  | -1.111601 |
| 34 | 1  | -3.967046  | -0.451981 | -1.202321 |
| 35 | 8  | -1.116112  | 2.989298  | -0.066261 |
| 36 | 6  | 0.057657   | 2.244515  | -0.401525 |
| 37 | 1  | 0.133830   | 1.340554  | 0.217924  |
| 38 | 1  | 0.060605   | 1.979900  | -1.468196 |

|    |   |           |           |           |
|----|---|-----------|-----------|-----------|
| 39 | 8 | 1.120566  | 3.156209  | -0.106804 |
| 40 | 6 | 2.436831  | 2.709685  | -0.229371 |
| 41 | 6 | 3.443522  | 3.615391  | 0.169802  |
| 42 | 6 | 4.776803  | 3.216640  | 0.101185  |
| 43 | 6 | 5.139213  | 1.937574  | -0.360540 |
| 44 | 6 | 4.125827  | 1.054312  | -0.772639 |
| 45 | 6 | 2.787320  | 1.438697  | -0.709212 |
| 46 | 1 | 5.530656  | 3.925847  | 0.426450  |
| 47 | 1 | 4.406636  | 0.072882  | -1.135474 |
| 48 | 1 | 2.022716  | 0.739522  | -1.026993 |
| 49 | 6 | 6.551334  | 1.557383  | -0.406085 |
| 50 | 7 | 6.945569  | 0.409994  | -0.851201 |
| 51 | 1 | 7.260714  | 2.315545  | -0.046478 |
| 52 | 6 | 10.992949 | -0.898253 | -0.876636 |
| 53 | 6 | 10.530142 | -0.047529 | 0.149140  |
| 54 | 6 | 9.213804  | 0.406987  | 0.176362  |
| 55 | 6 | 8.300965  | 0.014249  | -0.824292 |
| 56 | 6 | 8.746490  | -0.857411 | -1.834012 |
| 57 | 6 | 10.069653 | -1.290020 | -1.868457 |
| 58 | 1 | 11.206441 | 0.243748  | 0.946242  |
| 59 | 1 | 8.880042  | 1.033924  | 0.997083  |
| 60 | 1 | 8.036663  | -1.169569 | -2.591867 |
| 61 | 1 | 10.397719 | -1.932542 | -2.678379 |
| 62 | 6 | 12.387520 | -1.365917 | -0.912665 |
| 63 | 6 | 13.522595 | -0.731300 | -0.282757 |
| 64 | 6 | 14.705701 | -1.458419 | -0.634625 |
| 65 | 6 | 12.896790 | -2.503478 | -1.641813 |
| 66 | 6 | 14.318921 | -2.554336 | -1.475446 |
| 67 | 6 | 12.014810 | -3.303829 | 1.819981  |
| 68 | 1 | 10.990119 | -2.975426 | 1.897525  |

|    |    |            |           |           |
|----|----|------------|-----------|-----------|
| 69 | 6  | 13.150538  | -2.679533 | 2.436877  |
| 70 | 6  | 14.320946  | -3.426791 | 2.071779  |
| 71 | 6  | 12.482632  | -4.436974 | 1.073913  |
| 72 | 6  | 13.907995  | -4.512972 | 1.229108  |
| 73 | 26 | 13.373852  | -2.694390 | 0.369055  |
| 74 | 1  | 14.553732  | -5.262590 | 0.799170  |
| 75 | 1  | 15.331234  | -3.216695 | 2.386197  |
| 76 | 1  | 13.127742  | -1.809958 | 3.074845  |
| 77 | 1  | 11.869049  | -5.117165 | 0.504331  |
| 78 | 1  | 13.491388  | 0.166148  | 0.314772  |
| 79 | 1  | 15.712052  | -1.213985 | -0.332830 |
| 80 | 1  | 14.981963  | -3.285788 | -1.910216 |
| 81 | 1  | 12.307812  | -3.199837 | -2.217658 |
| 82 | 1  | -15.441969 | -2.007595 | -1.710628 |
| 83 | 1  | -12.908706 | -1.390428 | -2.383423 |
| 84 | 1  | -15.760427 | -1.488980 | 0.924489  |
| 85 | 1  | -14.422253 | -5.180008 | -1.032744 |
| 86 | 1  | -14.864016 | -4.680651 | 1.586962  |
| 87 | 1  | -12.568612 | -3.729424 | 2.654867  |
| 88 | 1  | -11.853608 | -4.540113 | -1.583393 |
| 89 | 1  | -13.416831 | -0.573303 | 1.884666  |
| 90 | 8  | 3.167708   | 4.868360  | 0.707154  |
| 91 | 8  | -3.326265  | 4.316113  | 0.967423  |
| 92 | 6  | -2.635658  | 5.444014  | 0.297098  |
| 93 | 6  | 2.400796   | 5.840420  | -0.105272 |
| 94 | 1  | -2.177216  | 5.097919  | -0.631944 |
| 95 | 1  | 1.388096   | 5.460962  | -0.255428 |
| 96 | 6  | 2.412349   | 7.144576  | 0.671040  |
| 97 | 6  | -1.599710  | 6.006982  | 1.253393  |
| 98 | 1  | -3.415263  | 6.177455  | 0.062547  |

|     |   |           |          |           |
|-----|---|-----------|----------|-----------|
| 99  | 1 | -2.065715 | 6.270319 | 2.208211  |
| 100 | 1 | -0.815822 | 5.267175 | 1.435396  |
| 101 | 1 | -1.145325 | 6.911826 | 0.831090  |
| 102 | 1 | 3.437323  | 7.494181 | 0.828273  |
| 103 | 1 | 1.860287  | 7.916167 | 0.121972  |
| 104 | 1 | 1.940758  | 7.009268 | 1.649048  |
| 105 | 1 | 2.895304  | 5.944310 | -1.080168 |
